# Supplementary material for: Are generalists more innovative than specialists? A comparison of innovative abilities in two wild sympatric mouse lemur species
Source: R Soc Open Sci. 2018 Aug 15;5(8):180480. doi: 10.1098/rsos.180480 (PMC6124029; doi:10.1098/rsos.180480)
Supplement: Personality data [file rsos180480supp2.xlsx]

## Sheet: MS_OFNO
ID	species	sex	experiment_finished	participated	no_test	field	latency_1st_movement	no_cells	locomoting	jump_rate	watching	sniffing	object	latency_1st_contact	contact	exploration_speed	active_exploration	neophilia	passive_exploration
06E4_715D	Mmu	F	1	1	1	Maze	22.89	17	22.67	0	137	8.95	S_green	98.65	1.42	0.74989	1.82342	0.193278	-0.06859
06E4_715D	Mmu	F	1	1	2	Box	12.12	68	133.77	9	145.36	6.16	C_PoliceB	238.8	3.29	0.476291	-0.226129	-1.23784	-0.506931
06E4_9B52	Mmu	M	0	1	1	Box	20.34	13	41.6	1	123.39	5.97	C_yellow	300	0	0.305164	1.66224	1.63312	0.31213
0757_AC84	Mmu	M	0	0	1	Box	4	42	67	2	147	68	C_green	58	10	0.608696	0.378718	-0.882561	-3.9968
0757_AE0E	Mbe	F	1	1	1	Box	26.56	16	61.03	2	130.48	3.63	S_pink	300	0	0.253847	1.37364	1.63312	0.363555
0757_AE0E	Mbe	F	1	1	2	Maze	0	85	156.79	0	135.03	0	C_gray	8.1	125.21	0.542126	-0.72952	3.20652	-1.15964
0757_B602	Mmu	M	0	1	1	Maze	54.8	34	163.49	0	73.77	13.06	C_PoliceB	35.92	15.78	0.207964	0.381353	-1.57292	0.548113
0757_B602	Mmu	M	0	1	2	Box	11.99	78	153.32	14	94.5	10.24	S_normal	24.69	9.74	0.466173	-0.874	0.321502	-0.784826
0757_B831	Mbe	M	1	1	1	Box	5	25	131	3	101	0	C_PoliceS	116	5	0.186567	0.224886	-0.0331667	1.00696
0757_B831	Mbe	M	1	1	2	Maze	3.94	140	220.28	0	74.07	5.65	S_red	29.19	8.73	0.635555	-2.53785	0.267705	-1.4279
0757_BDCB	Mbe	M	1	1	1	Maze	6.85	57	151.69	0	119.33	10.82	C_gray	178.18	6.98	0.375766	-0.59528	0.18251	0.0574603
0757_BDCB	Mbe	M	1	1	2	Box	42.53	84	110.09	8	145.41	12.64	S_red	169.07	1.59	0.711322	0.394961	-0.821378	0.0465537
0757_BF40	Mbe	F	0	1	1	Maze	92.99	27	175.58	0	58.46	0	S_normal	300	0	0.153776	0.811753	1.63312	1.59929
0757_C5AD	Mmu	M	0	1	1	Maze	8.65	47	176.56	0	114.28	9.16	C_PoliceB	125.83	5.26	0.266198	-0.511764	0.00594886	0.234292
0757_CA2C	Mbe	M	1	1	1	Box	36	44	115	8	53	7	C_green	111	13	0.357724	-0.339683	-0.822967	1.22616
0757_CA2C	Mbe	M	1	1	2	Maze	8	63	66	0	88	13	S_pink	300	0	0.954545	0.969512	-1.71833	-0.629349
0757_D1E9	Mmu	M	0	1	1	Box	9.27	43	142.63	6	142.79	4.84	C_PoliceB	157.66	6.53	0.289309	-0.615319	0.0920765	0.114509
0757_D7C9	Mmu	M	1	1	1	Box	33.27	59	168.48	14	111.39	6.13	S_pink	51.45	2.51	0.323323	-1.78397	-0.215926	0.468953
0757_D7C9	Mmu	M	1	1	2	Maze	10.45	36	40.7	0	219.5	21.16	C_PoliceS	37.5	9.14	0.884521	1.878	0.22306	1.68539
0757_D7E0	Mbe	M	0	0	1	Box	33.54	27	101.17	3	158.94	7.03	S_green	28.21	17.63	0.259192	0.680987	-1.79805	-0.250888
0757_D98F	Mbe	F	0	1	1	Box	3	40	169	14	81	16	C_gray	53	41	0.218579	-1.51155	-3.84984	0.258796
0757_E010	Mmu	M	0	0	1	Maze	25.95	25	80.2	0	200.55	9.61	S_green	178.3	0.51	0.311721	1.11625	0.795823	-0.995818
0757_E1DE	Mmu	M	0	1	1	Maze	18.95	25	229.33	0	57.76	12.91	S_yellow	98.02	5.61	0.109013	-0.255121	-0.207486	0.780664
0757_EEC9	Mbe	M	0	1	1	Box	2	85	149	19	92	27	C_gray	21	6	0.505952	-3.06662	-0.74375	-0.600189
0757_F0FC	Mbe	F	0	1	1	Maze	212.47	11	37.27	0	82.05	0	S_normal	300	0	0.295144	3.53639	1.63312	1.27082
0757_F427	Mbe	M	0	0	1	Box	17.54	70	123.02	10	152.49	14.49	S_normal	37.21	17.05	0.526237	-1.49032	-1.68479	-0.639751
0757_FA7D	Mbe	F	1	1	1	Box	105	28	99	6	135	0	C_PoliceB	76	2	0.266667	1.04003	-0.00847825	0.533538
0757_FA7D	Mbe	F	1	1	2	Maze	42	89	68	0	189	30	S_red	23	11	1.30882	1.11174	0.362879	2.06421
0758_01F6	Mmu	M	0	1	1	Box	20.88	78	159.93	12	117.48	6.68	C_PoliceS	164.9	6.8	0.453673	-2.18774	0.113454	0.348865
0758_03A6	Mmu	M	0	1	1	Maze	13.14	30	98.74	0	178.4	7.38	S_green	32.77	19.36	0.303828	0.697568	-1.93227	-0.54431
0758_06BE	Mmu	F	0	0	1	Maze	103.65	45	66.22	0	116.98	17.27	C_PoliceB	87.21	19.16	0.679553	1.35113	-1.56039	-0.323685
075A_012E	Mmu	F	0	1	1	Maze	13.05	62	64.42	0	217.79	17.79	S_red	7.6	9.51	0.962434	0.082721	-1.16293	-1.76074
075A_11ED	Mmu	F	0	1	1	Maze	13.35	25	110.67	0	153.95	31.78	C_PoliceS	300	0	0.225897	0.737685	1.63312	-1.7695
075A_1DB2	Mmu	M	0	1	1	Box	7.15	57	149.06	8	134.25	8.69	S_normal	17.34	1.57	0.362919	-1.26479	-0.348077	-0.0136156
075A_1E7E	Mmu	F	0	1	1	Box	7	55	222	12	5	4	C_yellow	286	5	0.235043	-2.19711	1.06899	2.08701
075A_3CE2	Mmu	M	1	1	1	Maze	6.82	65	233.05	0	58.32	5.8	C_green	0.49	6.02	0.27891	-1.53895	-0.878615	1.22908
075A_3CE2	Mmu	M	1	1	2	Box	4.83	59	108.79	16	116.64	17.4	S_normal	7.04	4.8	0.472794	-0.18283	0.31849	0.0985648
075A_3FEA	Mbe	F	0	0	1	Box	20.49	66	151.57	13	114.22	21.21	C_gray	30.11	11.28	0.401045	-1.86136	-1.18456	-0.538066
075A_42A9	Mbe	M	1	1	1	Maze	28.99	15	20.93	0	217.69	6.52	S_red	300	0	0.716675	1.94964	1.63312	-1.03621
075A_42A9	Mbe	M	1	1	2	Box	8.21	43	67.66	4	208.4	1.2	C_yellow	0	0	0.600056	1.20155	0.249258	-0.154202
075A_4506	Mbe	M	0	0	1	Box	49.53	42	82.37	3	183.17	3.92	C_PoliceS	82.32	2.89	0.491976	0.557787	-0.051763	-0.388716
075A_47A9	Mbe	M	1	1	1	Maze	46.68	33	164.67	0	115.83	0	S_red	49.48	9.96	0.200401	0.328089	-0.934012	0.800464
075A_47A9	Mbe	M	1	1	2	Box	4.31	83	148.8	24	110.24	12.82	C_yellow	41.05	10.07	0.480324	-1.49473	0.222137	-0.37097
075A_4860	Mmu	F	0	0	1	Box	24	40	116	7	146	17	C_yellow	300	0	0.325203	-0.252804	1.63312	-0.710438
075A_5344	Mbe	F	0	1	1	Box	26.91	51	86.97	11	182.58	0	S_yellow	22.3	8.54	0.520568	-0.63454	-0.975791	-0.128972
075A_6495	Mmu	F	1	1	1	Box	23.8	48	134.4	8	138.3	11.96	S_yellow	300	0	0.337079	-0.731935	1.63312	-0.279829
075A_6495	Mmu	F	1	1	2	Maze	11.37	53	47.5	0	238.84	13.66	C_green	21.86	6.16	1.11579	1.46546	0.25399	1.28354
075A_6F17	Mmu	F	0	0	1	Maze	20.66	17	93.63	0	167.87	7.57	C_gray	300	0	0.181566	1.18058	1.63312	-0.40988
075A_72A6	Mmu	M	0	1	1	Maze	6.09	70	215.75	0	74.71	9.54	C_PoliceS	39.59	16.59	0.32445	-1.53648	-1.62581	0.760887
075A_72A6	Mmu	M	0	1	2	Box	3.25	106	192.29	26	78.08	3.63	S_pink	10.77	7.68	0.485593	-2.59092	0.36327	-1.55089
075A_75EA	Mmu	M	0	0	1	Maze	2.41	61	114.41	0	166.06	14.1	S_yellow	36.77	4.74	0.53317	-0.421406	-0.522221	-0.803677
075A_791B	Mmu	M	1	1	1	Box	28	84	217	4	66	6	C_PoliceB	62	5	0.38009	-2.10265	-0.383263	1.10931
075A_791B	Mmu	M	1	1	2	Maze	4	97	99	0	116	26	S_green	198	3	0.979798	-0.206971	-0.977219	0.824434
075A_7ACF	Mmu	M	1	1	1	Box	36.71	43	106.36	5	168.41	6.37	S_pink	26.77	1.01	0.386135	0.0317767	-0.233923	-0.3404
075A_7ACF	Mmu	M	1	1	2	Maze	22.08	40	41.96	0	249.75	8.12	C_yellow	38.76	22.04	0.953289	2.02073	0.524947	0.945155
075A_7C2A	Mmu	M	0	0	1	Maze	31.44	51	179.46	0	111.97	0	S_red	218.28	1.64	0.284186	-0.450965	0.948043	0.854211
075A_8AA5	Mmu	F	0	1	1	Box	0	65	194.1	14.82	84.95	6.13	S_green	300	0	0.311124	-2.54488	1.63312	0.837108
075A_8CB1	Mmu	M	0	0	1	Box	24	38	126	2	142	18	C_yellow	128	4	0.296875	0.151119	0.139306	-0.718907
075A_91A3	Mmu	M	0	1	1	Maze	5.13	23	35.59	0	171.64	8.21	S_normal	135.59	0.59	0.646249	1.3819	0.511349	-0.50344
075A_920D	Mmu	M	0	0	1	Maze	34.88	27	61.02	0	209.48	11.06	S_pink	245.23	3.9	0.442478	1.30612	0.908806	-1.2132
075A_9483	Mmu	M	0	1	1	Box	0	22	88	3	159	30	C_PoliceB	131	8	0.241758	0.644323	-0.219937	-1.7256
075A_9919	Mmu	M	0	0	1	Maze	28.28	45	98.27	0	189.27	10.07	S_green	300	0	0.457922	0.405901	1.63312	-0.86827
075D_FBDE	Mmu	M	0	1	1	Maze	17.45	39	55.72	0	233.12	3.23	S_pink	16.56	7.28	0.699928	0.855869	-0.893717	-1.03995
075D_FC78	Mmu	M	0	1	1	Maze	198.8	5	32.73	0	105.75	2.36	S_yellow	111.91	3.2	0.152765	3.62753	0.110728	0.789389
075D_FC78	Mmu	M	0	1	2	Box	12.52	77	156.05	31	99.01	6.67	C_yellow	18.44	1.29	0.411655	-1.57653	0.159332	-1.03391
075D_FCE9	Mmu	F	0	0	1	Maze	5.23	3	3.03	0	24.29	0	C_yellow	57.85	2.38	0.990099	2.2409	-0.162125	2.07508
075D_FE96	Mmu	F	0	0	1	Box	0	59	126	20	95	9	C_green	300	0	0.40411	-2.22532	1.63312	0.513015
076D_3E08	Mmu	M	0	1	1	Box	0	9	38	1	57	25	C_PoliceB	300	0	0.230769	1.62916	1.63312	0.0154868
076D_3E08	Mmu	M	0	1	2	Maze	5.82	49	52.19	0	179.28	15.07	S_red	300	0	0.938877	1.37753	-1.71833	0.67076
076D_412A	Mbe	F	0	0	1	Box	1.3	77	189.18	11	90.72	9.1	C_green	42.6	5.4	0.384654	-2.50154	-0.546908	0.566194
076D_46D5	Mbe	F	0	0	1	Maze	69.68	38	159.54	0	93.17	3.24	S_red	146.78	15.89	0.238185	0.432651	-0.864601	0.908089
